# Supplementary material for: Continued Endocrine Therapy Is Associated with Improved Survival in Patients with Breast Cancer Brain Metastases
Source: Oxford University Press journal article supplement (doi:10.1158/1078-0432.ccr-18-1968), 2019-01-15
Supplement: 10780432ccr181968-sup-203967_2_supp_5220449_pjnbsc.docx [file 10780432ccr181968-sup-203967_2_supp_5220449_pjnbsc.docx]

| **Patient characteristics** | **entered patients (*n =* 198)** | |
| --- | --- | --- |
|  | **n** | **%** |
| Gender |  | |
| Female | 195 | 98.5 |
| Male | 3 | 1.5 |
| Median age at first diagnosis | 50 | |
| range | 22-91 | |
| Histology of primary tumour |  | |
| invasive ductal carcinoma | 122 | 61.6 |
| invasive lobular carcinoma | 38 | 19.2 |
| others | 6 | 3.0 |
| unknown | *32/198 (16.2%)* | |
| Grading of primary tumour |  | |
| Grade 1 | 9 | 4.5 |
| Grade 2 | 63 | 31.8 |
| Grade 3 | 55 | 27.8 |
| unknown | *71/198 (35.9%)* | |
| HER2 receptor status |  | |
| negative | 169 | 85.4 |
| no Her2 status (diagnosis before 2000) | 26 | 13.1 |
| unknown | *3/198 (1.5%)* | |
| Distant metastases at diagnosis/ Stage IV |  | |
| yes | 28 | 14.1 |
| no | 170 | 85.9 |
| Adjuvant chemotherapy |  | |
| yes | 89 | 44.9 |
| no | 70 | 35.4 |
| unknown + Stage IV | *39/198 (19.7%)* | |
| Adjuvant endocrine therapy |  | |
| yes | 124 | 62.6 |
| no | 27 | 13.6 |
| unknown + Stage IV | *47/198 (23.7%)* | |
| Adjuvant radiotherapy |  | |
| yes | 112 | 56.7 |
| no | 52 | 26.3 |
| unknown + Stage IV | *34/198 (17.2%)* | |
| Visceral metastases before BM |  | |
| yes | 115 | 58.1 |
| no | 80 | 40.4 |
| unknown | *3/198 (1.5%)* | |
| Systemic disease status at diagnosis of BM |  | |
| no evidence of extracranial disease and complete remission | 40 | 20.2 |
| partial remission | 11 | 5.6 |
| stable disease | 54 | 27.3 |
| progressive disease | 64 | 32.3 |
| unknown | *29/198 (14.6%)* | |
| Progressive extracranial disease at diagnosis of BM |  | |
| yes | 64 | 32.3 |
| no | 105 | 53.0 |
| unknown | *29/198 (14.6%)* | |
| Median metastatic sites before BM | 2 | |
| range | 0-8 | |
| Median lines of chemotherapy before BM | 1 | |
| range | 0-9 | |
| Median lines of ET before BM | 1 | |
| range | 0-6 | |
| Median time to recurrence from first diagnosis until metastases (months) | 44 | |
| range | 0-352 | |
| Median BM free survival from metastatic disease until BM (months) | 14 | |
| range | 0-213 | |
| Concomitant leptomeningeal carcinomatosis at diagnosis of BM |  | |
| yes | 30 | 15.2 |
| no | 168 | 84.8 |
| Progression or local recurrence of BM after initial diagnosis of BM |  | |
| yes | 76 | 38.4 |
| no | 74 | 37.4 |
| unknown | 48/198 (24.2%) | |
| Systemic progressive disease after initial diagnosis of BM |  | |
| yes | 77 | 38.9 |
| no | 73 | 36.9 |
| unknown | 48/198 (24.2%) | |
| Death due to BM |  | |
| yes | 38 | 19.2 |
| no | 13 | 6.6 |
| unknown | 147/198 (74.2%) | |
