# Supplementary material for: Continued Endocrine Therapy Is Associated with Improved Survival in Patients with Breast Cancer Brain Metastases
Source: Oxford University Press journal article supplement (doi:10.1158/1078-0432.ccr-18-1968), 2019-01-15
Supplement: 10780432ccr181968-sup-203967_2_supp_5246988_pkgh1g.docx [file 10780432ccr181968-sup-203967_2_supp_5246988_pkgh1g.docx]

**Supplementary table legend**

Supplementary table 1: Patients characteristics of the overall population
